# Supplementary material for: Integrative genomics analysis identifies five promising genes implicated in insomnia risk based on multiple omics datasets
Source: PubMed Central journal article supplement (PMC7468094; doi:10.1042/bsr20201084), 2020-09-02
Supplement: BSR-2020-1084_supp.pdf [file BSR-2020-1084_supp.pdf]

## Supplemental Tables

**Supplemental Table S1. *Sherlock* integrative analysis identifies 449 genes as insomnia risk genes in discovery samples**

| <b>Gene</b>      | <b>LBF</b> | <b><i>Sherlock</i>-based</b> | <b>GWAS Catalog</b> |
|------------------|------------|------------------------------|---------------------|
| <i>FOXF2</i>     | -0.046     | 8.89E-06                     | Reported gene       |
| <i>FAM193A</i>   | -0.047     | 1.22E-04                     | Novel gene          |
| <i>PAIP1</i>     | -0.047     | 3.33E-04                     | Novel gene          |
| <i>MPG</i>       | -0.048     | 3.67E-04                     | Novel gene          |
| <i>INO80</i>     | -0.048     | 5.00E-04                     | Novel gene          |
| <i>VPS13B</i>    | -0.048     | 5.98E-04                     | Novel gene          |
| <i>TGFB3</i>     | -0.048     | 7.78E-04                     | Novel gene          |
| <i>LOC283537</i> | -0.048     | 8.00E-04                     | Novel gene          |
| <i>LOC155340</i> | -0.048     | 9.16E-04                     | Novel gene          |
| <i>GLUL</i>      | -0.048     | 1.05E-03                     | Novel gene          |
| <i>RPS17</i>     | -0.049     | 1.22E-03                     | Novel gene          |
| <i>ZNF621</i>    | -0.049     | 1.33E-03                     | Novel gene          |
| <i>SMYD5</i>     | -0.049     | 1.34E-03                     | Novel gene          |
| <i>PLLP</i>      | -0.049     | 1.46E-03                     | Reported gene       |
| <i>RWDD2B</i>    | -0.049     | 1.60E-03                     | Novel gene          |
| <i>CAT</i>       | -0.049     | 1.74E-03                     | Novel gene          |
| <i>SMEK1</i>     | -0.049     | 1.89E-03                     | Reported gene       |
| <i>NDUFS6</i>    | -0.049     | 1.90E-03                     | Novel gene          |
| <i>LYL1</i>      | -0.049     | 2.00E-03                     | Novel gene          |
| <i>FAF1</i>      | -0.049     | 2.11E-03                     | Novel gene          |
| <i>TNFSF13</i>   | -0.049     | 2.29E-03                     | Novel gene          |
| <i>HNRNPC</i>    | -0.050     | 2.35E-03                     | Novel gene          |
| <i>GRSF1</i>     | -0.050     | 2.52E-03                     | Novel gene          |
| <i>BCAS1</i>     | -0.050     | 2.58E-03                     | Novel gene          |
| <i>WWC1</i>      | -0.050     | 2.73E-03                     | Reported gene       |
| <i>VPS52</i>     | -0.050     | 2.85E-03                     | Novel gene          |
| <i>SLC26A11</i>  | -0.050     | 3.00E-03                     | Novel gene          |
| <i>PLCB1</i>     | -0.050     | 3.11E-03                     | Reported gene       |
| <i>C15orf41</i>  | -0.050     | 3.19E-03                     | Novel gene          |
| <i>PCBD1</i>     | -0.050     | 0.003                        | Novel gene          |
| <i>RPS21</i>     | -0.050     | 0.003                        | Novel gene          |
| <i>CCT8</i>      | -0.050     | 0.003                        | Novel gene          |
| <i>KPTN</i>      | -0.050     | 0.004                        | Novel gene          |
| <i>SPOCK2</i>    | -0.050     | 0.004                        | Novel gene          |
| <i>SLC35A1</i>   | -0.051     | 0.004                        | Novel gene          |
| <i>CDC27</i>     | -0.051     | 0.004                        | Novel gene          |
| <i>DAPK1</i>     | -0.051     | 0.004                        | Reported gene       |
| <i>AMT</i>       | -0.051     | 0.004                        | Reported gene       |
| <i>MYO5C</i>     | -0.051     | 0.004                        | Novel gene          |
| <i>PDE4C</i>     | -0.051     | 0.004                        | Novel gene          |
| <i>FBXO28</i>    | -0.051     | 0.005                        | Novel gene          |
| <i>HPCL2</i>     | -0.051     | 0.005                        | Novel gene          |
| <i>GRAMD1A</i>   | -0.052     | 0.005                        | Novel gene          |
| <i>CYB561D1</i>  | -0.052     | 0.005                        | Novel gene          |
| <i>S1PR5</i>     | -0.052     | 0.005                        | Novel gene          |
| <i>IL18</i>      | -0.052     | 0.005                        | Novel gene          |

|                  |        |       |            |
|------------------|--------|-------|------------|
| <i>ZCRB1</i>     | -0.052 | 0.005 | Novel gene |
| <i>NUBPL</i>     | -0.052 | 0.005 | Novel gene |
| <i>NASP</i>      | -0.052 | 0.005 | Novel gene |
| <i>LOC400810</i> | -0.052 | 0.006 | Novel gene |
| <i>B3GAT1</i>    | -0.052 | 0.006 | Novel gene |
| <i>PIK3IP1</i>   | -0.052 | 0.006 | Novel gene |
| <i>GRAMD3</i>    | -0.052 | 0.006 | Novel gene |
| <i>PIEZO2</i>    | -0.053 | 0.006 | Novel gene |
| <i>PSEN1</i>     | -0.053 | 0.006 | Novel gene |
| <i>TNS3</i>      | -0.053 | 0.006 | Novel gene |
| <i>RBBP7</i>     | -0.053 | 0.006 | Novel gene |
| <i>LOC170371</i> | -0.053 | 0.006 | Novel gene |
| <i>LIPE</i>      | -0.053 | 0.007 | Novel gene |
| <i>TRAPPC10</i>  | -0.053 | 0.007 | Novel gene |
| <i>C7orf63</i>   | -0.053 | 0.007 | Novel gene |
| <i>CHD8</i>      | -0.053 | 0.007 | Novel gene |
| <i>MFSD5</i>     | -0.053 | 0.007 | Novel gene |
| <i>BRODL</i>     | -0.053 | 0.007 | Novel gene |
| <i>C14orf43</i>  | -0.053 | 0.007 | Novel gene |
| <i>CCDC106</i>   | -0.053 | 0.007 | Novel gene |
| <i>FA2H</i>      | -0.053 | 0.007 | Novel gene |
| <i>LOC143425</i> | -0.053 | 0.008 | Novel gene |
| <i>C19orf10</i>  | -0.054 | 0.008 | Novel gene |
| <i>TNFAIP2</i>   | -0.054 | 0.008 | Novel gene |
| <i>LOC285148</i> | -0.054 | 0.008 | Novel gene |
| <i>MFF</i>       | -0.054 | 0.008 | Novel gene |
| <i>SLC25A38</i>  | -0.054 | 0.008 | Novel gene |
| <i>KCNMA1</i>    | -0.054 | 0.008 | Novel gene |
| <i>ANKRD37</i>   | -0.054 | 0.008 | Novel gene |
| <i>LOC348094</i> | -0.054 | 0.008 | Novel gene |
| <i>CARHSP1</i>   | -0.054 | 0.009 | Novel gene |
| <i>RAB33A</i>    | -0.054 | 0.009 | Novel gene |
| <i>SEZ6L2</i>    | -0.054 | 0.009 | Novel gene |
| <i>NPLOC4</i>    | -0.054 | 0.009 | Novel gene |
| <i>SNX27</i>     | -0.055 | 0.009 | Novel gene |
| <i>LDHA</i>      | -0.055 | 0.009 | Novel gene |
| <i>PFN2</i>      | -0.055 | 0.009 | Novel gene |
| <i>TMEM209</i>   | -0.055 | 0.009 | Novel gene |
| <i>ZNF668</i>    | -0.055 | 0.009 | Novel gene |
| <i>SMARCA4</i>   | -0.056 | 0.010 | Novel gene |
| <i>TST</i>       | -0.056 | 0.010 | Novel gene |
| <i>GPHN</i>      | -0.056 | 0.010 | Novel gene |
| <i>LOC399917</i> | -0.056 | 0.010 | Novel gene |
| <i>ZADH2</i>     | -0.056 | 0.010 | Novel gene |
| <i>DARC</i>      | -0.056 | 0.010 | Novel gene |
| <i>SESN1</i>     | -0.056 | 0.010 | Novel gene |
| <i>SAMD4B</i>    | -0.056 | 0.010 | Novel gene |
| <i>BCORL1</i>    | -0.056 | 0.010 | Novel gene |
| <i>DENND1B</i>   | -0.056 | 0.011 | Novel gene |
| <i>EFCAB6</i>    | -0.056 | 0.011 | Novel gene |
| <i>LOC284347</i> | -0.056 | 0.011 | Novel gene |
| <i>FRMD6</i>     | -0.056 | 0.011 | Novel gene |
| <i>VSIG1</i>     | -0.057 | 0.011 | Novel gene |

|                  |        |       |               |
|------------------|--------|-------|---------------|
| <i>C19orf53</i>  | -0.057 | 0.011 | Novel gene    |
| <i>ATP5G1</i>    | -0.057 | 0.011 | Novel gene    |
| <i>DALRD3</i>    | -0.057 | 0.011 | Novel gene    |
| <i>ZNF518B</i>   | -0.057 | 0.011 | Novel gene    |
| <i>SPP1</i>      | -0.057 | 0.012 | Novel gene    |
| <i>PTPLB</i>     | -0.057 | 0.012 | Novel gene    |
| <i>LOC401155</i> | -0.057 | 0.012 | Novel gene    |
| <i>TAF4</i>      | -0.057 | 0.012 | Novel gene    |
| <i>EMX2</i>      | -0.057 | 0.012 | Novel gene    |
| <i>LOC401260</i> | -0.057 | 0.012 | Novel gene    |
| <i>C4orf29</i>   | -0.058 | 0.012 | Novel gene    |
| <i>EIF3FP2</i>   | -0.058 | 0.012 | Novel gene    |
| <i>ZNF22</i>     | -0.058 | 0.012 | Novel gene    |
| <i>HSPA12A</i>   | -0.058 | 0.013 | Novel gene    |
| <i>CYB5R2</i>    | -0.058 | 0.013 | Novel gene    |
| <i>DLX6-AS1</i>  | -0.058 | 0.013 | Novel gene    |
| <i>NMT2</i>      | -0.058 | 0.013 | Novel gene    |
| <i>STS</i>       | -0.058 | 0.013 | Novel gene    |
| <i>LOC401528</i> | -0.058 | 0.013 | Novel gene    |
| <i>FKBP8</i>     | -0.059 | 0.013 | Novel gene    |
| <i>NFXL1</i>     | -0.059 | 0.013 | Novel gene    |
| <i>CLDN5</i>     | -0.059 | 0.013 | Novel gene    |
| <i>SEC62</i>     | -0.059 | 0.014 | Novel gene    |
| <i>ABL1</i>      | -0.059 | 0.014 | Novel gene    |
| <i>LZIC</i>      | -0.059 | 0.014 | Novel gene    |
| <i>RAB40C</i>    | -0.059 | 0.014 | Novel gene    |
| <i>SIPA1L2</i>   | -0.059 | 0.014 | Novel gene    |
| <i>PRSS23</i>    | -0.060 | 0.014 | Novel gene    |
| <i>RPAP1</i>     | -0.060 | 0.014 | Novel gene    |
| <i>RHBDD2</i>    | -0.060 | 0.014 | Novel gene    |
| <i>PTPN4</i>     | -0.060 | 0.014 | Novel gene    |
| <i>COX4I1</i>    | -0.060 | 0.015 | Novel gene    |
| <i>PIEZO1</i>    | -0.060 | 0.015 | Novel gene    |
| <i>FABP6</i>     | -0.060 | 0.015 | Novel gene    |
| <i>SDCBP2</i>    | -0.060 | 0.015 | Novel gene    |
| <i>THY1</i>      | -0.060 | 0.015 | Novel gene    |
| <i>SGK1</i>      | -0.060 | 0.015 | Novel gene    |
| <i>ZNF554</i>    | -0.060 | 0.015 | Novel gene    |
| <i>SLC20A2</i>   | -0.060 | 0.015 | Novel gene    |
| <i>CNRIP1</i>    | -0.060 | 0.015 | Novel gene    |
| <i>FUCA1</i>     | -0.060 | 0.016 | Novel gene    |
| <i>HNRNPR</i>    | -0.060 | 0.016 | Novel gene    |
| <i>GTPBP4</i>    | -0.060 | 0.016 | Novel gene    |
| <i>SNX11</i>     | -0.061 | 0.016 | Novel gene    |
| <i>BRPF3</i>     | -0.061 | 0.016 | Novel gene    |
| <i>NDST2</i>     | -0.061 | 0.016 | Novel gene    |
| <i>CHCHD3</i>    | -0.061 | 0.016 | Reported gene |
| <i>SLC4A8</i>    | -0.061 | 0.016 | Novel gene    |
| <i>CDK18</i>     | -0.061 | 0.016 | Novel gene    |
| <i>CPNE8</i>     | -0.061 | 0.017 | Novel gene    |
| <i>LOC342808</i> | -0.061 | 0.017 | Novel gene    |
| <i>KRTCAP2</i>   | -0.061 | 0.017 | Novel gene    |
| <i>IFIH1</i>     | -0.061 | 0.017 | Novel gene    |

|                  |        |       |               |
|------------------|--------|-------|---------------|
| <i>TUBG1</i>     | -0.061 | 0.017 | Novel gene    |
| <i>VAC14</i>     | -0.061 | 0.017 | Novel gene    |
| <i>POPDC3</i>    | -0.062 | 0.017 | Novel gene    |
| <i>TXN2</i>      | -0.062 | 0.017 | Novel gene    |
| <i>EFEMP1</i>    | -0.062 | 0.017 | Novel gene    |
| <i>SSR4</i>      | -0.062 | 0.018 | Novel gene    |
| <i>NOC3L</i>     | -0.062 | 0.018 | Novel gene    |
| <i>ALDH9A1</i>   | -0.062 | 0.018 | Novel gene    |
| <i>NUP107</i>    | -0.062 | 0.018 | Novel gene    |
| <i>FOXQ1</i>     | -0.062 | 0.018 | Reported gene |
| <i>ECSIT</i>     | -0.062 | 0.018 | Novel gene    |
| <i>FXR2</i>      | -0.062 | 0.018 | Novel gene    |
| <i>ITGAX</i>     | -0.062 | 0.018 | Novel gene    |
| <i>LAPTM5</i>    | -0.062 | 0.018 | Novel gene    |
| <i>ZBED1</i>     | -0.062 | 0.018 | Novel gene    |
| <i>XPO5</i>      | -0.062 | 0.019 | Novel gene    |
| <i>PCBP1</i>     | -0.062 | 0.019 | Novel gene    |
| <i>LOC222901</i> | -0.062 | 0.019 | Novel gene    |
| <i>SERTAD2</i>   | -0.063 | 0.019 | Novel gene    |
| <i>NDUFS5</i>    | -0.063 | 0.019 | Novel gene    |
| <i>PPIL4</i>     | -0.063 | 0.019 | Novel gene    |
| <i>C9orf9</i>    | -0.063 | 0.019 | Novel gene    |
| <i>RAPGEF2</i>   | -0.063 | 0.019 | Novel gene    |
| <i>DONSON</i>    | -0.063 | 0.020 | Novel gene    |
| <i>RGS14</i>     | -0.063 | 0.020 | Novel gene    |
| <i>SMG5</i>      | -0.063 | 0.020 | Novel gene    |
| <i>LOC91526</i>  | -0.063 | 0.020 | Novel gene    |
| <i>PLCB2</i>     | -0.063 | 0.020 | Novel gene    |
| <i>RIOK1</i>     | -0.063 | 0.020 | Novel gene    |
| <i>TXNRD2</i>    | -0.063 | 0.020 | Novel gene    |
| <i>LOC51248</i>  | -0.063 | 0.020 | Novel gene    |
| <i>TDG</i>       | -0.063 | 0.020 | Novel gene    |
| <i>PPARD</i>     | -0.063 | 0.021 | Novel gene    |
| <i>ARMCX3</i>    | -0.063 | 0.021 | Novel gene    |
| <i>UBL5</i>      | -0.063 | 0.021 | Reported gene |
| <i>HYAL2</i>     | -0.064 | 0.021 | Reported gene |
| <i>DPP8</i>      | -0.064 | 0.021 | Novel gene    |
| <i>XPO7</i>      | -0.064 | 0.021 | Novel gene    |
| <i>TMED4</i>     | -0.064 | 0.021 | Novel gene    |
| <i>RNMTL1</i>    | -0.064 | 0.021 | Novel gene    |
| <i>TMEM200A</i>  | -0.064 | 0.021 | Novel gene    |
| <i>LOC389348</i> | -0.064 | 0.022 | Novel gene    |
| <i>HBA1</i>      | -0.064 | 0.022 | Novel gene    |
| <i>RAB9A</i>     | -0.064 | 0.022 | Novel gene    |
| <i>ZBTB38</i>    | -0.064 | 0.022 | Novel gene    |
| <i>PIH1D1</i>    | -0.064 | 0.022 | Novel gene    |
| <i>LOC157567</i> | -0.065 | 0.022 | Novel gene    |
| <i>FAM122A</i>   | -0.065 | 0.022 | Novel gene    |
| <i>C2CD2</i>     | -0.065 | 0.022 | Novel gene    |
| <i>LDLR</i>      | -0.065 | 0.022 | Novel gene    |
| <i>UPRT</i>      | -0.065 | 0.023 | Novel gene    |
| <i>GRINA</i>     | -0.065 | 0.023 | Novel gene    |
| <i>MRP63</i>     | -0.065 | 0.023 | Novel gene    |

|                   |        |       |               |
|-------------------|--------|-------|---------------|
| <i>U2AF1L4</i>    | -0.065 | 0.023 | Novel gene    |
| <i>PBXIP1</i>     | -0.065 | 0.023 | Novel gene    |
| <i>TERF2</i>      | -0.065 | 0.023 | Novel gene    |
| <i>RNASEH1P1</i>  | -0.065 | 0.023 | Novel gene    |
| <i>TCERG1L</i>    | -0.065 | 0.023 | Novel gene    |
| <i>TEX264</i>     | -0.065 | 0.023 | Novel gene    |
| <i>GPR22</i>      | -0.065 | 0.024 | Novel gene    |
| <i>BRAP</i>       | -0.066 | 0.024 | Novel gene    |
| <i>SYNJ2BP</i>    | -0.066 | 0.024 | Novel gene    |
| <i>PLEC</i>       | -0.066 | 0.024 | Novel gene    |
| <i>CD37</i>       | -0.066 | 0.024 | Novel gene    |
| <i>ZFC3H1</i>     | -0.066 | 0.024 | Novel gene    |
| <i>FAM222B</i>    | -0.066 | 0.024 | Novel gene    |
| <i>15-Sep</i>     | -0.066 | 0.024 | Novel gene    |
| <i>LINC00526</i>  | -0.066 | 0.024 | Novel gene    |
| <i>BRX1</i>       | -0.066 | 0.025 | Novel gene    |
| <i>FLJ20373</i>   | -0.066 | 0.025 | Novel gene    |
| <i>ZNF524</i>     | -0.066 | 0.025 | Novel gene    |
| <i>RRP8</i>       | -0.066 | 0.025 | Novel gene    |
| <i>PIAS3</i>      | -0.066 | 0.025 | Novel gene    |
| <i>MAP4K2</i>     | -0.066 | 0.025 | Novel gene    |
| <i>RTCA</i>       | -0.066 | 0.025 | Novel gene    |
| <i>MPZL2</i>      | -0.066 | 0.025 | Reported gene |
| <i>PPM1G</i>      | -0.067 | 0.025 | Novel gene    |
| <i>DERA</i>       | -0.067 | 0.025 | Novel gene    |
| <i>KLHL28</i>     | -0.067 | 0.026 | Novel gene    |
| <i>SERINC2</i>    | -0.067 | 0.026 | Novel gene    |
| <i>PTGES3</i>     | -0.067 | 0.026 | Novel gene    |
| <i>DHRS4L2</i>    | -0.067 | 0.026 | Novel gene    |
| <i>YWHAE</i>      | -0.067 | 0.026 | Novel gene    |
| <i>IGF1R</i>      | -0.067 | 0.026 | Novel gene    |
| <i>ZNF18</i>      | -0.067 | 0.026 | Novel gene    |
| <i>AGPAT4-IT1</i> | -0.067 | 0.026 | Novel gene    |
| <i>TBC1D14</i>    | -0.067 | 0.027 | Novel gene    |
| <i>TBRG1</i>      | -0.067 | 0.027 | Novel gene    |
| <i>STX12</i>      | -0.067 | 0.027 | Novel gene    |
| <i>BMP1</i>       | -0.067 | 0.027 | Novel gene    |
| <i>NLE1</i>       | -0.068 | 0.027 | Novel gene    |
| <i>PPP1R3D</i>    | -0.068 | 0.027 | Novel gene    |
| <i>TP53BP1</i>    | -0.068 | 0.027 | Novel gene    |
| <i>PDK2</i>       | -0.068 | 0.027 | Novel gene    |
| <i>TBL3</i>       | -0.068 | 0.027 | Novel gene    |
| <i>SLC27A5</i>    | -0.068 | 0.028 | Novel gene    |
| <i>ICT1</i>       | -0.068 | 0.028 | Novel gene    |
| <i>MPST</i>       | -0.068 | 0.028 | Novel gene    |
| <i>CHEK2</i>      | -0.068 | 0.028 | Novel gene    |
| <i>DCBLD2</i>     | -0.068 | 0.028 | Novel gene    |
| <i>CUL4B</i>      | -0.068 | 0.028 | Novel gene    |
| <i>RBBP9</i>      | -0.068 | 0.028 | Novel gene    |
| <i>WIPF2</i>      | -0.068 | 0.028 | Novel gene    |
| <i>NIPA2</i>      | -0.068 | 0.028 | Novel gene    |
| <i>SYT11</i>      | -0.068 | 0.029 | Novel gene    |
| <i>GOLPH3</i>     | -0.069 | 0.029 | Novel gene    |

|                  |        |       |               |
|------------------|--------|-------|---------------|
| <i>GGCX</i>      | -0.069 | 0.029 | Novel gene    |
| <i>NARG2</i>     | -0.069 | 0.029 | Novel gene    |
| <i>ELP4</i>      | -0.069 | 0.029 | Novel gene    |
| <i>LOC91942</i>  | -0.069 | 0.029 | Novel gene    |
| <i>PRPF4</i>     | -0.069 | 0.029 | Novel gene    |
| <i>LOC399865</i> | -0.069 | 0.029 | Novel gene    |
| <i>SDHA</i>      | -0.069 | 0.029 | Novel gene    |
| <i>GALNTL4</i>   | -0.069 | 0.030 | Novel gene    |
| <i>SOX13</i>     | -0.069 | 0.030 | Novel gene    |
| <i>TRIM56</i>    | -0.069 | 0.030 | Novel gene    |
| <i>MYL5</i>      | -0.069 | 0.030 | Novel gene    |
| <i>SRSF2</i>     | -0.069 | 0.030 | Novel gene    |
| <i>SLAIN1</i>    | -0.069 | 0.030 | Novel gene    |
| <i>RHOG</i>      | -0.069 | 0.030 | Novel gene    |
| <i>RAI14</i>     | -0.069 | 0.030 | Reported gene |
| <i>CTSO</i>      | -0.070 | 0.030 | Novel gene    |
| <i>MRPS11</i>    | -0.070 | 0.030 | Novel gene    |
| <i>MESDC1</i>    | -0.070 | 0.031 | Novel gene    |
| <i>FABP7</i>     | -0.070 | 0.031 | Novel gene    |
| <i>ATP5B</i>     | -0.070 | 0.031 | Novel gene    |
| <i>FAM129A</i>   | -0.070 | 0.031 | Novel gene    |
| <i>LOC130617</i> | -0.070 | 0.031 | Novel gene    |
| <i>LRRN1</i>     | -0.070 | 0.031 | Novel gene    |
| <i>BMI1</i>      | -0.070 | 0.031 | Novel gene    |
| <i>KIAA1033</i>  | -0.070 | 0.031 | Novel gene    |
| <i>ETHE1</i>     | -0.070 | 0.031 | Novel gene    |
| <i>C6orf130</i>  | -0.070 | 0.032 | Novel gene    |
| <i>ATP9B</i>     | -0.070 | 0.032 | Novel gene    |
| <i>C10orf137</i> | -0.070 | 0.032 | Novel gene    |
| <i>SLC35D2</i>   | -0.070 | 0.032 | Novel gene    |
| <i>SOD1</i>      | -0.070 | 0.032 | Novel gene    |
| <i>PCID2</i>     | -0.070 | 0.032 | Novel gene    |
| <i>ZNF510</i>    | -0.070 | 0.032 | Novel gene    |
| <i>PRUNE</i>     | -0.070 | 0.032 | Novel gene    |
| <i>NUP88</i>     | -0.071 | 0.033 | Novel gene    |
| <i>DAAM2</i>     | -0.071 | 0.033 | Novel gene    |
| <i>C4orf27</i>   | -0.071 | 0.033 | Novel gene    |
| <i>FGFR3</i>     | -0.071 | 0.033 | Novel gene    |
| <i>WDR77</i>     | -0.071 | 0.033 | Novel gene    |
| <i>HAUS2</i>     | -0.071 | 0.033 | Novel gene    |
| <i>HLA-DPB1</i>  | -0.071 | 0.033 | Novel gene    |
| <i>DDX52</i>     | -0.071 | 0.033 | Novel gene    |
| <i>SCFD1</i>     | -0.071 | 0.033 | Reported gene |
| <i>HS3ST6</i>    | -0.071 | 0.034 | Novel gene    |
| <i>CKS1B</i>     | -0.071 | 0.034 | Novel gene    |
| <i>GEMIN4</i>    | -0.071 | 0.034 | Novel gene    |
| <i>FOXJ3</i>     | -0.071 | 0.034 | Novel gene    |
| <i>STAB1</i>     | -0.071 | 0.034 | Novel gene    |
| <i>SECISBP2L</i> | -0.071 | 0.034 | Novel gene    |
| <i>CYBRD1</i>    | -0.071 | 0.034 | Novel gene    |
| <i>TOMM40L</i>   | -0.071 | 0.034 | Novel gene    |
| <i>AP3M2</i>     | -0.071 | 0.034 | Novel gene    |
| <i>LSM4</i>      | -0.071 | 0.035 | Novel gene    |

|                  |        |       |               |
|------------------|--------|-------|---------------|
| <i>CCND1</i>     | -0.071 | 0.035 | Novel gene    |
| <i>METTL1</i>    | -0.071 | 0.035 | Novel gene    |
| <i>APC</i>       | -0.072 | 0.035 | Novel gene    |
| <i>PPP1R14C</i>  | -0.072 | 0.035 | Novel gene    |
| <i>CNNM2</i>     | -0.072 | 0.035 | Novel gene    |
| <i>LARP1</i>     | -0.072 | 0.035 | Novel gene    |
| <i>UQCRH</i>     | -0.072 | 0.035 | Novel gene    |
| <i>DHX38</i>     | -0.072 | 0.035 | Novel gene    |
| <i>RNF43</i>     | -0.072 | 0.036 | Novel gene    |
| <i>CD99L2</i>    | -0.073 | 0.036 | Novel gene    |
| <i>SLC12A9</i>   | -0.073 | 0.036 | Novel gene    |
| <i>FXYS5</i>     | -0.073 | 0.036 | Novel gene    |
| <i>BAZ1B</i>     | -0.073 | 0.036 | Novel gene    |
| <i>SLC48A1</i>   | -0.073 | 0.036 | Novel gene    |
| <i>THAP6</i>     | -0.073 | 0.036 | Novel gene    |
| <i>OXCT1</i>     | -0.073 | 0.036 | Novel gene    |
| <i>YTHDF2P1</i>  | -0.073 | 0.036 | Novel gene    |
| <i>LASP1</i>     | -0.073 | 0.037 | Novel gene    |
| <i>PIAS4</i>     | -0.073 | 0.037 | Novel gene    |
| <i>NLK</i>       | -0.073 | 0.037 | Novel gene    |
| <i>MGST2</i>     | -0.073 | 0.037 | Novel gene    |
| <i>DAB2</i>      | -0.074 | 0.037 | Novel gene    |
| <i>MRPL39</i>    | -0.074 | 0.037 | Novel gene    |
| <i>UBTD1</i>     | -0.074 | 0.037 | Novel gene    |
| <i>TPPP</i>      | -0.074 | 0.037 | Novel gene    |
| <i>DFFB</i>      | -0.074 | 0.037 | Novel gene    |
| <i>ATP2C1</i>    | -0.074 | 0.038 | Novel gene    |
| <i>DHX8</i>      | -0.074 | 0.038 | Novel gene    |
| <i>VPS26B</i>    | -0.074 | 0.038 | Novel gene    |
| <i>BCL2L13</i>   | -0.074 | 0.038 | Novel gene    |
| <i>CRY1</i>      | -0.074 | 0.038 | Novel gene    |
| <i>PDS5A</i>     | -0.074 | 0.038 | Novel gene    |
| <i>ACADM</i>     | -0.074 | 0.038 | Reported gene |
| <i>PHB</i>       | -0.074 | 0.038 | Novel gene    |
| <i>ATPAF2</i>    | -0.075 | 0.038 | Novel gene    |
| <i>DYNC1I2</i>   | -0.075 | 0.039 | Novel gene    |
| <i>CCDC51</i>    | -0.075 | 0.039 | Novel gene    |
| <i>FSTL3</i>     | -0.075 | 0.039 | Novel gene    |
| <i>H105E3</i>    | -0.075 | 0.039 | Novel gene    |
| <i>SDHD</i>      | -0.075 | 0.039 | Novel gene    |
| <i>FLJ32205</i>  | -0.075 | 0.039 | Novel gene    |
| <i>TAF6L</i>     | -0.075 | 0.039 | Novel gene    |
| <i>ATAD2</i>     | -0.075 | 0.039 | Novel gene    |
| <i>RAB18</i>     | -0.075 | 0.039 | Novel gene    |
| <i>CTSH</i>      | -0.075 | 0.040 | Novel gene    |
| <i>G2E3</i>      | -0.075 | 0.040 | Novel gene    |
| <i>CTC1</i>      | -0.075 | 0.040 | Reported gene |
| <i>LOC401033</i> | -0.075 | 0.040 | Novel gene    |
| <i>MAPK11</i>    | -0.075 | 0.040 | Novel gene    |
| <i>NDUFB4</i>    | -0.075 | 0.040 | Novel gene    |
| <i>HSPBP1</i>    | -0.075 | 0.040 | Novel gene    |
| <i>ERRFI1</i>    | -0.076 | 0.040 | Novel gene    |
| <i>NAGA</i>      | -0.076 | 0.040 | Novel gene    |

|                  |        |       |               |
|------------------|--------|-------|---------------|
| <i>PIP5K1A</i>   | -0.076 | 0.041 | Novel gene    |
| <i>TEX29</i>     | -0.076 | 0.041 | Novel gene    |
| <i>ZKSCAN5</i>   | -0.076 | 0.041 | Novel gene    |
| <i>HYI</i>       | -0.076 | 0.041 | Novel gene    |
| <i>R3HDM2</i>    | -0.076 | 0.041 | Novel gene    |
| <i>ST3GAL5</i>   | -0.076 | 0.041 | Novel gene    |
| <i>CCND2</i>     | -0.076 | 0.041 | Novel gene    |
| <i>ANK2</i>      | -0.076 | 0.041 | Novel gene    |
| <i>PHF17</i>     | -0.076 | 0.041 | Novel gene    |
| <i>ABCC13</i>    | -0.076 | 0.042 | Novel gene    |
| <i>PTPRN2</i>    | -0.077 | 0.042 | Novel gene    |
| <i>CIRBP</i>     | -0.077 | 0.042 | Novel gene    |
| <i>TMEM19</i>    | -0.077 | 0.042 | Novel gene    |
| <i>LOC401505</i> | -0.077 | 0.042 | Novel gene    |
| <i>TCEB3</i>     | -0.077 | 0.042 | Novel gene    |
| <i>CTCF</i>      | -0.077 | 0.042 | Novel gene    |
| <i>PEG10</i>     | -0.077 | 0.042 | Novel gene    |
| <i>TCEB1</i>     | -0.077 | 0.042 | Novel gene    |
| <i>MAP6D1</i>    | -0.077 | 0.043 | Novel gene    |
| <i>WFDC2</i>     | -0.077 | 0.043 | Novel gene    |
| <i>UQCRC2</i>    | -0.077 | 0.043 | Novel gene    |
| <i>SOCS2</i>     | -0.077 | 0.043 | Novel gene    |
| <i>IDUA</i>      | -0.077 | 0.043 | Novel gene    |
| <i>LOC51693</i>  | -0.077 | 0.043 | Novel gene    |
| <i>SERPINA3</i>  | -0.077 | 0.043 | Novel gene    |
| <i>HSPA5</i>     | -0.077 | 0.043 | Novel gene    |
| <i>ANKRD24</i>   | -0.077 | 0.043 | Novel gene    |
| <i>ZMYM1</i>     | -0.078 | 0.044 | Novel gene    |
| <i>CIB2</i>      | -0.078 | 0.044 | Novel gene    |
| <i>PRO1843</i>   | -0.078 | 0.044 | Novel gene    |
| <i>RHOA</i>      | -0.078 | 0.044 | Reported gene |
| <i>ANKS1A</i>    | -0.078 | 0.044 | Novel gene    |
| <i>MMP28</i>     | -0.078 | 0.044 | Novel gene    |
| <i>RPS23</i>     | -0.078 | 0.044 | Novel gene    |
| <i>LOC389792</i> | -0.079 | 0.044 | Novel gene    |
| <i>ATP6V1E1</i>  | -0.079 | 0.044 | Novel gene    |
| <i>LOC51145</i>  | -0.079 | 0.045 | Novel gene    |
| <i>FCGR3A</i>    | -0.079 | 0.045 | Novel gene    |
| <i>LRRCC1</i>    | -0.079 | 0.045 | Novel gene    |
| <i>FAM13B</i>    | -0.079 | 0.045 | Novel gene    |
| <i>PDGFA</i>     | -0.079 | 0.045 | Novel gene    |
| <i>RNF13</i>     | -0.079 | 0.045 | Novel gene    |
| <i>FAM174B</i>   | -0.079 | 0.045 | Reported gene |
| <i>GCA</i>       | -0.080 | 0.045 | Novel gene    |
| <i>TK2</i>       | -0.080 | 0.045 | Novel gene    |
| <i>ANXA11</i>    | -0.080 | 0.045 | Novel gene    |
| <i>GTF3C6</i>    | -0.080 | 0.046 | Novel gene    |
| <i>LOC148203</i> | -0.080 | 0.046 | Novel gene    |
| <i>RABEPK</i>    | -0.080 | 0.046 | Novel gene    |
| <i>TSPAN6</i>    | -0.080 | 0.046 | Novel gene    |
| <i>LOC126208</i> | -0.080 | 0.046 | Novel gene    |
| <i>HEBP2</i>     | -0.080 | 0.046 | Novel gene    |
| <i>TMEM140</i>   | -0.081 | 0.046 | Novel gene    |



|                  |        |       |               |
|------------------|--------|-------|---------------|
| <i>CCDC12</i>    | -0.081 | 0.046 | Novel gene    |
| <i>MAN2A1</i>    | -0.081 | 0.047 | Novel gene    |
| <i>RAD9A</i>     | -0.081 | 0.047 | Novel gene    |
| <i>ZDHHC14</i>   | -0.081 | 0.047 | Novel gene    |
| <i>LOC399979</i> | -0.081 | 0.047 | Novel gene    |
| <i>VWA5B2</i>    | -0.081 | 0.047 | Novel gene    |
| <i>VCAM1</i>     | -0.081 | 0.047 | Novel gene    |
| <i>SEC61G</i>    | -0.081 | 0.047 | Novel gene    |
| <i>ELOVL1</i>    | -0.081 | 0.047 | Novel gene    |
| <i>FLJ23529</i>  | -0.081 | 0.047 | Novel gene    |
| <i>HDDC3</i>     | -0.082 | 0.048 | Novel gene    |
| <i>ZFHX2</i>     | -0.082 | 0.048 | Novel gene    |
| <i>FNBP1L</i>    | -0.082 | 0.048 | Novel gene    |
| <i>ENY2</i>      | -0.082 | 0.048 | Reported gene |
| <i>SF3A3</i>     | -0.082 | 0.048 | Novel gene    |
| <i>TRIB3</i>     | -0.082 | 0.048 | Novel gene    |
| <i>UBA7</i>      | -0.082 | 0.048 | Reported gene |
| <i>COG3</i>      | -0.082 | 0.048 | Novel gene    |
| <i>UBE2F</i>     | -0.082 | 0.048 | Novel gene    |
| <i>EYA2</i>      | -0.083 | 0.049 | Novel gene    |
| <i>SNTA1</i>     | -0.083 | 0.049 | Novel gene    |
| <i>HNRNPU</i>    | -0.083 | 0.049 | Novel gene    |
| <i>LOC114984</i> | -0.083 | 0.049 | Novel gene    |
| <i>CPNE2</i>     | -0.083 | 0.049 | Novel gene    |
| <i>LOC388341</i> | -0.083 | 0.049 | Novel gene    |
| <i>OGFOD2</i>    | -0.083 | 0.049 | Novel gene    |
| <i>C8orf42</i>   | -0.083 | 0.049 | Novel gene    |
| <i>LOC400586</i> | -0.083 | 0.049 | Novel gene    |
| <i>NEO1</i>      | -0.083 | 0.050 | Novel gene    |
| <i>ZNF436</i>    | -0.083 | 0.050 | Novel gene    |
| <i>REEP6</i>     | -0.083 | 0.050 | Novel gene    |
| <i>FRG1</i>      | -0.083 | 0.050 | Novel gene    |

**Supplemental Table S2. Significant pathways enriched by insomnia-related genes identified from *Sherlock* integrative analysis**

| <b>Pathway ID</b> | <b>Pathway Terms</b>      | <b>Associated genes proportion</b> | <b>P value</b> | <b>Corrected P value</b> |
|-------------------|---------------------------|------------------------------------|----------------|--------------------------|
| KEGG:05016        | Huntington's disease      | 0.073                              | 5.58E-05       | 0.014                    |
| KEGG:05010        | Alzheimer's disease       | 0.076                              | 6.34E-05       | 0.015                    |
| KEGG:00190        | Oxidative phosphorylation | 0.083                              | 1.09E-04       | 0.026                    |
| KEGG:03040        | Spliceosome               | 0.082                              | 1.17E-04       | 0.028                    |
| KEGG:05012        | Parkinson's disease       | 0.077                              | 1.95E-04       | 0.045                    |
| KEGG:04310        | Wnt signaling pathway     | 0.077                              | 2.07E-04       | 0.048                    |

**Supplemental Table S3. Significant GO-terms enriched by insomnia-related genes identified from *Sherlock* integrative analysis**

| <b>GO ID</b> | <b>GO Terms</b>                               | <b>Associated genes p<br/>roportion</b> | <b>P value</b> | <b>Corrected P value</b> |
|--------------|-----------------------------------------------|-----------------------------------------|----------------|--------------------------|
| GO:0003730   | mRNA 3'-UTR<br>binding                        | 0.12                                    | 7.39E-05       | 0.018                    |
| GO:0003729   | mRNA binding                                  | 0.069                                   | 1.01E-04       | 0.024                    |
| GO:0030529   | Intracellular<br>ribonucleoprotein<br>complex | 0.045                                   | 1.10E-05       | 0.003                    |
| GO:0044429   | Mitochondrial part                            | 0.041                                   | 3.22E-05       | 0.008                    |
| GO:0098798   | Mitochondrial protein<br>complex              | 0.082                                   | 6.08E-05       | 0.015                    |
| GO:0044455   | Mitochondrial<br>membrane part                | 0.069                                   | 1.01E-04       | 0.024                    |
| GO:0098803   | Respiratory chain<br>complex                  | 0.11                                    | 1.82E-04       | 0.042                    |
| GO:0006275   | Regulation of DNA<br>replication              | 0.085                                   | 8.28E-05       | 0.020                    |
| GO:0006611   | Protein export from<br>nucleus                | 0.069                                   | 1.65E-04       | 0.039                    |
| GO:0051169   | Nuclear transport                             | 0.048                                   | 1.82E-04       | 0.042                    |

**Supplemental Table S4. Phenotype-related gene sets in WebGeslat resource significantly enriched by insomnia-associated genes identified from *Sherlock* integrative analysis**

| Gene Set   | Description                                               | Size | Expect | Ratio | P Value  |
|------------|-----------------------------------------------------------|------|--------|-------|----------|
| HP:0002060 | Abnormality of the cerebrum                               | 1313 | 29.10  | 1.62  | 4.88E-05 |
| HP:0100547 | Abnormality of forebrain morphology                       | 1334 | 29.56  | 1.59  | 7.66E-05 |
| HP:0002011 | Morphological abnormality of the central nervous system   | 1909 | 42.30  | 1.37  | 4.17E-04 |
| HP:0012758 | Neurodevelopmental delay                                  | 1474 | 32.66  | 1.47  | 5.19E-04 |
| HP:0011804 | Abnormality of muscle physiology                          | 1758 | 38.96  | 1.39  | 7.28E-04 |
| HP:0012443 | Abnormality of brain morphology                           | 1741 | 38.58  | 1.37  | 1.16E-03 |
| HP:0008972 | Decreased activity of mitochondrial respiratory chain     | 55   | 1.22   | 4.92  | 1.21E-03 |
| HP:0001252 | Muscular hypotonia                                        | 1187 | 26.30  | 1.52  | 1.23E-03 |
| HP:0011922 | Abnormal activity of mitochondrial respiratory chain      | 56   | 1.24   | 4.84  | 1.33E-03 |
| HP:0001263 | Global developmental delay                                | 1238 | 27.43  | 1.49  | 1.47E-03 |
| HP:0003110 | Abnormality of urine homeostasis                          | 455  | 10.08  | 1.98  | 1.74E-03 |
| HP:0003808 | Abnormal muscle tone                                      | 1467 | 32.51  | 1.42  | 2.00E-03 |
| HP:0002536 | Abnormal cortical gyration                                | 211  | 4.68   | 2.57  | 2.09E-03 |
| HP:0002269 | Abnormality of neuronal migration                         | 274  | 6.07   | 2.31  | 2.44E-03 |
| HP:0012759 | Neurodevelopmental abnormality                            | 1975 | 43.76  | 1.30  | 2.55E-03 |
| HP:0001640 | Cardiomegaly                                              | 65   | 1.44   | 4.17  | 2.88E-03 |
| HP:0001250 | Seizures                                                  | 1321 | 29.27  | 1.43  | 2.94E-03 |
| HP:0002977 | Aplasia/Hypoplasia involving the central nervous system   | 1157 | 25.64  | 1.48  | 3.01E-03 |
| HP:0100833 | Neoplasm of the small intestine                           | 14   | 0.31   | 9.67  | 3.21E-03 |
| HP:0001166 | Arachnodactyly                                            | 89   | 1.97   | 3.55  | 3.25E-03 |
| HP:0002538 | Abnormality of the cerebral cortex                        | 226  | 5.01   | 2.40  | 3.72E-03 |
| HP:0003287 | Abnormality of mitochondrial metabolism                   | 116  | 2.57   | 3.11  | 3.79E-03 |
| HP:0009125 | Lipodystrophy                                             | 93   | 2.06   | 3.40  | 4.16E-03 |
| HP:0000298 | Mask-like facies                                          | 49   | 1.09   | 4.60  | 4.21E-03 |
| HP:0001098 | Abnormal fundus morphology                                | 939  | 20.81  | 1.54  | 4.42E-03 |
| HP:0002416 | Subependymal cysts                                        | 5    | 0.11   | 18.05 | 4.65E-03 |
| HP:0009659 | Partial absence of thumb                                  | 5    | 0.11   | 18.05 | 4.65E-03 |
| HP:0004329 | Abnormal morphology of the posterior segment of the globe | 942  | 20.87  | 1.53  | 4.66E-03 |
| HP:0008316 | Abnormal mitochondria in muscle tissue                    | 32   | 0.71   | 5.64  | 5.03E-03 |
| HP:0010993 | Abnormality of the cerebral subcortex                     | 643  | 14.25  | 1.68  | 5.21E-03 |
| HP:0001290 | Generalized hypotonia                                     | 718  | 15.91  | 1.63  | 5.28E-03 |
| HP:0003355 | Aminoaciduria                                             | 123  | 2.73   | 2.94  | 5.42E-03 |
| HP:0002938 | Lumbar hyperlordosis                                      | 52   | 1.15   | 4.34  | 5.45E-03 |
| HP:0000079 | Abnormality of the urinary system                         | 1321 | 29.27  | 1.40  | 5.64E-03 |
| HP:0002352 | Leukoencephalopathy                                       | 124  | 2.75   | 2.91  | 5.69E-03 |
| HP:0001238 | Slender finger                                            | 100  | 2.22   | 3.16  | 6.21E-03 |
| HP:0007364 | Aplasia/Hypoplasia of the cerebrum                        | 961  | 21.30  | 1.50  | 6.42E-03 |
| HP:0003546 | Exercise intolerance                                      | 77   | 1.71   | 3.52  | 6.69E-03 |
| HP:0001920 | Renal artery stenosis                                     | 18   | 0.40   | 7.52  | 6.74E-03 |

|            |                                                           |      |       |       |          |
|------------|-----------------------------------------------------------|------|-------|-------|----------|
| HP:0008776 | Abnormal renal artery morphology                          | 18   | 0.40  | 7.52  | 6.74E-03 |
| HP:0001014 | Angiokeratoma                                             | 6    | 0.13  | 15.04 | 6.87E-03 |
| HP:0012103 | Abnormality of the mitochondrion                          | 128  | 2.84  | 2.82  | 6.88E-03 |
| HP:0003367 | Abnormality of the femoral neck                           | 102  | 2.26  | 3.10  | 6.91E-03 |
| HP:0031650 | Abnormal atrioventricular valve physiology                | 102  | 2.26  | 3.10  | 6.91E-03 |
| HP:0100631 | Neoplasm of the adrenal gland                             | 35   | 0.78  | 5.16  | 6.97E-03 |
| HP:0011276 | Vascular skin abnormality                                 | 409  | 9.06  | 1.88  | 7.22E-03 |
| HP:0002376 | Developmental regression                                  | 216  | 4.79  | 2.30  | 7.48E-03 |
| HP:0200037 | Skin vesicle                                              | 19   | 0.42  | 7.13  | 7.88E-03 |
| HP:0002673 | Coxa valga                                                | 57   | 1.26  | 3.96  | 8.05E-03 |
| HP:0000980 | Pallor                                                    | 105  | 2.33  | 3.01  | 8.07E-03 |
| HP:0001347 | Hyperreflexia                                             | 556  | 12.32 | 1.70  | 8.24E-03 |
| HP:0009124 | Abnormal adipose tissue morphology                        | 160  | 3.55  | 2.54  | 8.28E-03 |
| HP:0000544 | External ophthalmoplegia                                  | 37   | 0.82  | 4.88  | 8.50E-03 |
| HP:0002808 | Kyphosis                                                  | 315  | 6.98  | 2.01  | 8.52E-03 |
| HP:0001257 | Spasticity                                                | 559  | 12.39 | 1.70  | 8.76E-03 |
| HP:0007367 | Atrophy/Degeneration affecting the central nervous system | 523  | 11.59 | 1.73  | 8.78E-03 |
| HP:0002815 | Abnormality of the knee                                   | 253  | 5.61  | 2.14  | 9.10E-03 |
| HP:0003207 | Arterial calcification                                    | 20   | 0.44  | 6.77  | 9.12E-03 |
| HP:0001373 | Joint dislocation                                         | 285  | 6.32  | 2.06  | 9.13E-03 |
| HP:0012372 | Abnormal eye morphology                                   | 1747 | 38.71 | 1.29  | 9.17E-03 |
| HP:0001582 | Redundant skin                                            | 59   | 1.31  | 3.82  | 9.30E-03 |
| HP:0002577 | Abnormality of the stomach                                | 352  | 7.80  | 1.92  | 9.42E-03 |
| HP:0006980 | Progressive leukoencephalopathy                           | 7    | 0.16  | 12.89 | 9.48E-03 |
| HP:0000587 | Abnormality of the optic nerve                            | 600  | 13.30 | 1.65  | 9.55E-03 |
| HP:0012072 | Aciduria                                                  | 164  | 3.63  | 2.48  | 9.68E-03 |
| HP:0011121 | Abnormality of skin morphology                            | 1447 | 32.06 | 1.34  | 1.01E-02 |
| HP:0031605 | Abnormality of fundus pigmentation                        | 21   | 0.47  | 6.45  | 1.05E-02 |
| HP:0100834 | Neoplasm of the large intestine                           | 61   | 1.35  | 3.70  | 1.07E-02 |
| HP:0000670 | Carious teeth                                             | 139  | 3.08  | 2.60  | 1.11E-02 |
| HP:0000240 | Abnormality of skull size                                 | 996  | 22.07 | 1.45  | 1.12E-02 |
| HP:0001339 | Lissencephaly                                             | 114  | 2.53  | 2.77  | 1.24E-02 |
| HP:0040223 | Pulmonary hemorrhage                                      | 8    | 0.18  | 11.28 | 1.25E-02 |
| HP:0000951 | Abnormality of the skin                                   | 1551 | 34.37 | 1.31  | 1.27E-02 |
| HP:0001939 | Abnormality of metabolism/homeostasis                     | 1819 | 40.31 | 1.27  | 1.30E-02 |
| HP:0002974 | Radioulnar synostosis                                     | 63   | 1.40  | 3.58  | 1.22E-02 |
| HP:0011277 | Abnormality of the urinary system physiology              | 730  | 16.18 | 1.55  | 1.30E-02 |
| HP:0100749 | Chest pain                                                | 64   | 1.42  | 3.53  | 1.30E-02 |
| HP:0004934 | Vascular calcification                                    | 23   | 0.51  | 5.89  | 1.35E-02 |
| HP:0000252 | Microcephaly                                              | 771  | 17.09 | 1.52  | 1.35E-02 |
| HP:0001276 | Hypertonia                                                | 696  | 15.42 | 1.56  | 1.40E-02 |
| HP:0040195 | Decreased head circumference                              | 773  | 17.13 | 1.52  | 1.40E-02 |
| HP:0003072 | Hypercalcemia                                             | 43   | 0.95  | 4.20  | 1.44E-02 |
| HP:0100539 | Periorbital edema                                         | 43   | 0.95  | 4.20  | 1.44E-02 |
| HP:0001681 | Angina pectoris                                           | 25   | 0.55  | 5.42  | 1.70E-02 |
| HP:0002036 | Hiatus hernia                                             | 24   | 0.53  | 5.64  | 1.52E-02 |

|            |                                                |      |       |       |          |
|------------|------------------------------------------------|------|-------|-------|----------|
| HP:0001279 | Syncope                                        | 44   | 0.98  | 4.10  | 1.55E-02 |
| HP:0001836 | Camptodactyly of toe                           | 9    | 0.20  | 10.03 | 1.58E-02 |
| HP:0025031 | Abnormality of the digestive system            | 1926 | 42.68 | 1.24  | 1.58E-02 |
| HP:0008046 | Abnormality of the retinal vasculature         | 178  | 3.94  | 2.28  | 1.60E-02 |
| HP:0000969 | Edema                                          | 340  | 7.53  | 1.86  | 1.61E-02 |
| HP:0003366 | Abnormality of the femoral neck or head region | 121  | 2.68  | 2.61  | 1.69E-02 |
| HP:0010876 | Abnormality of circulating protein level       | 338  | 7.49  | 1.87  | 1.53E-02 |
| HP:0011915 | Cardiovascular calcification                   | 25   | 0.55  | 5.42  | 1.70E-02 |
| HP:0100634 | Neuroendocrine neoplasm                        | 25   | 0.55  | 5.42  | 1.70E-02 |
| HP:0200034 | Papule                                         | 69   | 1.53  | 3.27  | 1.76E-02 |
| HP:0003712 | Skeletal muscle hypertrophy                    | 151  | 3.35  | 2.39  | 1.77E-02 |
| HP:0002167 | Neurological speech impairment                 | 789  | 17.48 | 1.49  | 1.81E-02 |
| HP:0000282 | Facial edema                                   | 46   | 1.02  | 3.92  | 1.81E-02 |
| HP:0001138 | Optic neuropathy                               | 46   | 1.02  | 3.92  | 1.81E-02 |
| HP:0000602 | Ophthalmoplegia                                | 213  | 4.72  | 2.12  | 1.82E-02 |

**Supplemental Table S5. Drug-related gene sets in GLAD4U resource significantly enriched by insomnia-associated genes identified from *Sherlock* integrative analysis**

| Gene Set    | Description                                                               | Size | Expect | Ratio | P Value  |
|-------------|---------------------------------------------------------------------------|------|--------|-------|----------|
| PA162364313 | bezafibrate                                                               | 20   | 0.40   | 9.91  | 6.09E-04 |
| PA450536    | molybdenum                                                                | 24   | 0.48   | 8.26  | 1.25E-03 |
| PA449942    | hydroxyurea                                                               | 86   | 1.74   | 4.03  | 1.74E-03 |
| PA451673    | l-threonine                                                               | 848  | 17.12  | 1.75  | 1.90E-03 |
| PA164712853 | Iron Preparations                                                         | 212  | 4.28   | 2.57  | 3.88E-03 |
| PA450087    | iron                                                                      | 212  | 4.28   | 2.57  | 3.88E-03 |
| PA450744    | oxygen                                                                    | 318  | 6.42   | 2.18  | 5.25E-03 |
| PA449789    | glycine                                                                   | 223  | 4.50   | 2.44  | 5.65E-03 |
| PA164776929 | lipoic acid                                                               | 59   | 1.19   | 4.20  | 6.65E-03 |
| PA448784    | carbachol                                                                 | 61   | 1.23   | 4.06  | 7.64E-03 |
| PA164712614 | Colchicine derivatives                                                    | 7    | 0.14   | 14.15 | 7.97E-03 |
| PA164713367 | Tumour Detection                                                          | 206  | 4.16   | 2.40  | 9.08E-03 |
| PA451704    | tobramycin                                                                | 116  | 2.34   | 2.99  | 9.10E-03 |
| PA164746343 | sulodexide                                                                | 8    | 0.16   | 12.39 | 1.05E-02 |
| PA164713204 | Protein kinase inhibitors                                                 | 490  | 9.89   | 1.82  | 1.06E-02 |
| PA451565    | sulindac                                                                  | 23   | 0.46   | 6.46  | 1.07E-02 |
| PA452612    | vinyl chloride                                                            | 23   | 0.46   | 6.46  | 1.07E-02 |
| PA166122986 | radiotherapy                                                              | 121  | 2.44   | 2.87  | 1.13E-02 |
| PA449917    | hydrogen peroxide                                                         | 152  | 3.07   | 2.61  | 1.20E-02 |
| PA164712734 | Enzymes                                                                   | 1996 | 40.29  | 1.34  | 1.32E-02 |
| PA164712467 | Antiinflammatory/antirheumatic agents in combination with corticosteroids | 9    | 0.18   | 11.01 | 1.33E-02 |
| PA164745443 | dydrogesterone                                                            | 9    | 0.18   | 11.01 | 1.33E-02 |
| PA10364     | memantine                                                                 | 25   | 0.50   | 5.94  | 1.35E-02 |
| PA164712693 | Diphtheria vaccines                                                       | 25   | 0.50   | 5.94  | 1.35E-02 |
| PA451644    | thalidomide                                                               | 46   | 0.93   | 4.31  | 1.36E-02 |
| PA166163262 | sodium ascorbate                                                          | 46   | 0.93   | 4.31  | 1.36E-02 |
| PA164712750 | Ethers                                                                    | 99   | 2.00   | 3.00  | 1.50E-02 |
| PA164752658 | porfimer                                                                  | 10   | 0.20   | 9.91  | 1.64E-02 |
| PA164712314 | Actinomycines                                                             | 193  | 3.90   | 2.31  | 1.65E-02 |
| PA151917012 | dactinomycin                                                              | 193  | 3.90   | 2.31  | 1.65E-02 |
| PA450954    | phosphorus                                                                | 51   | 1.03   | 3.89  | 1.93E-02 |
| PA153590860 | camptothecin                                                              | 105  | 2.12   | 2.83  | 1.95E-02 |
| PA166131608 | dovitinib                                                                 | 11   | 0.22   | 9.01  | 1.98E-02 |
| PA450644    | nitroglycerin                                                             | 11   | 0.22   | 9.01  | 1.98E-02 |
| PA1102      | qt-prolonging drugs                                                       | 29   | 0.59   | 5.12  | 2.02E-02 |
| PA151958596 | curcumin                                                                  | 53   | 1.07   | 3.74  | 2.19E-02 |
| PA164712582 | calcium                                                                   | 811  | 16.37  | 1.53  | 2.28E-02 |
| PA134687907 | formoterol                                                                | 12   | 0.24   | 8.26  | 2.34E-02 |
| PA10816     | ezetimibe                                                                 | 12   | 0.24   | 8.26  | 2.34E-02 |
| PA451898    | vitamin c                                                                 | 55   | 1.11   | 3.60  | 2.48E-02 |
| PA449776    | l-glutamic acid                                                           | 174  | 3.51   | 2.28  | 2.49E-02 |
| PA449376    | disulfiram                                                                | 13   | 0.26   | 7.62  | 2.73E-02 |

|             |                                                      |     |       |      |          |
|-------------|------------------------------------------------------|-----|-------|------|----------|
| PA165946121 | fasudil                                              | 13  | 0.26  | 7.62 | 2.73E-02 |
| PA449563    | exemestane                                           | 13  | 0.26  | 7.62 | 2.73E-02 |
| PA450280    | l-lysine                                             | 874 | 17.64 | 1.47 | 3.01E-02 |
| PA452611    | epipodophyllotoxin                                   | 117 | 2.36  | 2.54 | 3.12E-02 |
| PA450993    | podofilox                                            | 117 | 2.36  | 2.54 | 3.12E-02 |
| PA164754912 | fluocinolone acetonide                               | 14  | 0.28  | 7.08 | 3.15E-02 |
| PA451843    | l-valine                                             | 88  | 1.78  | 2.81 | 3.26E-02 |
| PA164754913 | netilmicin                                           | 90  | 1.82  | 2.75 | 3.54E-02 |
| PA164712466 | Antiinflammatory/antirheumatic Agents In Combination | 36  | 0.73  | 4.13 | 3.56E-02 |
| PA164713246 | Salt solutions                                       | 36  | 0.73  | 4.13 | 3.56E-02 |
| PA450196    | letrozole                                            | 15  | 0.30  | 6.61 | 3.58E-02 |
| PA450203    | leuprolide                                           | 15  | 0.30  | 6.61 | 3.58E-02 |
| PA164713003 | Other alkylating agents                              | 62  | 1.25  | 3.20 | 3.64E-02 |
| PA449021    | citric acid                                          | 92  | 1.86  | 2.69 | 3.84E-02 |
| PA166114906 | bosutinib                                            | 16  | 0.32  | 6.19 | 4.04E-02 |
| PA452620    | tegafur                                              | 16  | 0.32  | 6.19 | 4.04E-02 |
| PA164712585 | Calcium Homeostasis                                  | 193 | 3.90  | 2.05 | 4.22E-02 |
| PA166160055 | cholic acid                                          | 39  | 0.79  | 3.81 | 4.36E-02 |
| PA165860812 | berberine                                            | 17  | 0.34  | 5.83 | 4.52E-02 |
| PA448873    | cellulose                                            | 40  | 0.81  | 3.72 | 4.64E-02 |
| PA154081778 | 4-methylumbelliferone                                | 41  | 0.83  | 3.62 | 4.94E-02 |
| PA451261    | rituximab                                            | 41  | 0.83  | 3.62 | 4.94E-02 |
| PA10489     | selenium supplements                                 | 18  | 0.36  | 5.50 | 5.00E-02 |
| PA164712917 | Muscle Relaxants                                     | 18  | 0.36  | 5.50 | 5.00E-02 |



**Supplemental Table S6. Drug-related gene sets in DrugBank resource significantly enriched by insomnia-associated genes identified from *Sherlock* integrative analysis**

| Gene Set | Description                                                                     | Size | Expect | Ratio | P Value  |
|----------|---------------------------------------------------------------------------------|------|--------|-------|----------|
| DB04141  | 2-Hexyloxy-6-Hydroxymethyl-Tetrahydro-Pyran-3,4,5-Triol                         | 15   | 0.33   | 12.20 | 2.36E-04 |
| DB09270  | Ubidecarenone                                                                   | 6    | 0.13   | 15.26 | 6.66E-03 |
| DB13257  | Ferrous sulfate                                                                 | 20   | 0.44   | 6.86  | 8.70E-03 |
| DB01119  | Diazoxide                                                                       | 7    | 0.15   | 13.08 | 9.20E-03 |
| DB07763  | (5S)-3-ANILINO-5-(2,4-DIFLUOROPHENYL)-5-METHYL-1,3-OXAZOLIDINE-2,4-DIONE        | 10   | 0.22   | 9.15  | 1.89E-02 |
| DB08330  | METHYL (2Z)-3-METHOXY-2-{2-[(E)-2-PHENYLVINYL]PHENYL}ACRYLATE                   | 10   | 0.22   | 9.15  | 1.89E-02 |
| DB08453  | 2-NONYL-4-HYDROXYQUINOLINE N-OXIDE                                              | 10   | 0.22   | 9.15  | 1.89E-02 |
| DB08690  | UBIQUINONE-2                                                                    | 10   | 0.22   | 9.15  | 1.89E-02 |
| DB04799  | 5-n-undecyl-6-hydroxy-4,7-dioxobenzothiazole                                    | 10   | 0.22   | 9.15  | 1.89E-02 |
| DB07778  | FAMOxadone                                                                      | 10   | 0.22   | 9.15  | 1.89E-02 |
| DB07401  | METHYL (2Z)-2-(2-{[6-(2-CYANOPHENOXY)PYRIDIN-4-YL]OXY}PHENYL)-3-METHOXYACRYLATE | 10   | 0.22   | 9.15  | 1.89E-02 |
| DB00139  | Succinic acid                                                                   | 27   | 0.59   | 5.09  | 2.00E-02 |
| DB00132  | Alpha-Linolenic Acid                                                            | 11   | 0.24   | 8.32  | 2.28E-02 |
| DB04224  | Oleic Acid                                                                      | 12   | 0.26   | 7.63  | 2.69E-02 |
| DB00159  | Icosapent                                                                       | 13   | 0.28   | 7.04  | 3.14E-02 |
| DB09462  | Glycerin                                                                        | 15   | 0.33   | 6.10  | 4.11E-02 |
| DB12267  | Brigatinib                                                                      | 16   | 0.35   | 5.72  | 4.63E-02 |

**Supplemental Table S7. Sherlock integrative analysis identifies 184 genes as insomnia risk genes in validation samples (GTEx brain cortex samples)**

| <b>Gene</b>            | <b>LBF</b> | <b>Sherlock-based P value</b> | <b>GWAS catalog</b> |
|------------------------|------------|-------------------------------|---------------------|
| <i>FAM86DP</i>         | -0.376     | 2.303E-04                     | Novel gene          |
| <i>AP1G2</i>           | -0.380     | 5.155E-04                     | Novel gene          |
| <i>C10orf111</i>       | -0.396     | 5.758E-04                     | Novel gene          |
| <i>BTG1</i>            | -0.404     | 9.378E-04                     | Novel gene          |
| <i>TAF8</i>            | -0.413     | 1.311E-03                     | Novel gene          |
| <i>TXN</i>             | -0.423     | 1.579E-03                     | Novel gene          |
| <i>CSAD</i>            | -0.426     | 1.727E-03                     | Novel gene          |
| <i>ENSG00000270021</i> | -0.430     | 1.925E-03                     | Novel gene          |
| <i>ZBTB26</i>          | -0.431     | 2.468E-03                     | Novel gene          |
| <i>HSD17B7P2</i>       | -0.437     | 2.660E-03                     | Novel gene          |
| <i>ENSG00000227540</i> | -0.441     | 2.863E-03                     | Novel gene          |
| <i>DIS3L</i>           | -0.443     | 3.016E-03                     | Novel gene          |
| <i>ENSG00000214198</i> | -0.447     | 3.016E-03                     | Novel gene          |
| <i>MXRA8</i>           | -0.449     | 3.526E-03                     | Novel gene          |
| <i>SATB2-AS1</i>       | -0.451     | 3.718E-03                     | Novel gene          |
| <i>UQCRRS1</i>         | -0.454     | 3.987E-03                     | Novel gene          |
| <i>AMOTL1</i>          | -0.455     | 4.135E-03                     | Novel gene          |
| <i>MAPK14</i>          | -0.459     | 4.491E-03                     | Novel gene          |
| <i>VWA3B</i>           | -0.472     | 4.672E-03                     | Novel gene          |
| <i>GART</i>            | -0.478     | 4.996E-03                     | Novel gene          |
| <i>NPY5R</i>           | -0.480     | 5.473E-03                     | Novel gene          |
| <i>MYOZ3</i>           | -0.488     | 5.643E-03                     | Novel gene          |
| <i>URB1</i>            | -0.493     | 6.032E-03                     | Novel gene          |
| <i>RYR1</i>            | -0.494     | 6.038E-03                     | Novel gene          |
| <i>HLA-DMB</i>         | -0.497     | 6.367E-03                     | Novel gene          |
| <i>PSD2</i>            | -0.498     | 6.855E-03                     | Novel gene          |
| <i>ENSG00000226237</i> | -0.498     | 7.074E-03                     | Novel gene          |
| <i>ENSG00000239415</i> | -0.499     | 7.206E-03                     | Novel gene          |
| <i>ANKRD13B</i>        | -0.501     | 7.403E-03                     | Novel gene          |
| <i>SCNN1D</i>          | -0.507     | 7.880E-03                     | Novel gene          |
| <i>DNAJC12</i>         | -0.514     | 7.952E-03                     | Novel gene          |
| <i>SP110</i>           | -0.514     | 8.451E-03                     | Novel gene          |
| <i>GTSF1</i>           | -0.514     | 8.599E-03                     | Novel gene          |
| <i>LEFTY1</i>          | -0.518     | 8.900E-03                     | Novel gene          |
| <i>EXOC4</i>           | -0.521     | 9.235E-03                     | Novel gene          |
| <i>ZNF678</i>          | -0.522     | 0.010                         | Novel gene          |
| <i>MC1R</i>            | -0.523     | 0.010                         | Novel gene          |
| <i>ITGA11</i>          | -0.527     | 0.010                         | Novel gene          |
| <i>GPR98</i>           | -0.529     | 0.010                         | Novel gene          |
| <i>DHRS4</i>           | -0.536     | 0.011                         | Novel gene          |
| <i>C1orf194</i>        | -0.537     | 0.011                         | Novel gene          |
| <i>OR7E29P</i>         | -0.538     | 0.011                         | Novel gene          |
| <i>VWA8</i>            | -0.539     | 0.011                         | Novel gene          |
| <i>CHEK1</i>           | -0.540     | 0.012                         | Novel gene          |
| <i>MEGF8</i>           | -0.541     | 0.012                         | Novel gene          |
| <i>C6orf201</i>        | -0.542     | 0.012                         | Reported gene       |
| <i>TSC1</i>            | -0.546     | 0.012                         | Novel gene          |
| <i>STARD6</i>          | -0.546     | 0.013                         | Novel gene          |
| <i>C8orf31</i>         | -0.553     | 0.013                         | Novel gene          |

|                        |        |       |            |
|------------------------|--------|-------|------------|
| <i>KCNJ16</i>          | -0.554 | 0.013 | Novel gene |
| <i>ENSG00000213839</i> | -0.554 | 0.014 | Novel gene |
| <i>ENSG00000236915</i> | -0.557 | 0.014 | Novel gene |
| <i>ENSG00000216921</i> | -0.559 | 0.014 | Novel gene |
| <i>DHX36</i>           | -0.559 | 0.014 | Novel gene |
| <i>ENSG00000273075</i> | -0.561 | 0.015 | Novel gene |
| <i>HEBP2</i>           | -0.563 | 0.015 | Novel gene |
| <i>CST3</i>            | -0.564 | 0.015 | Novel gene |
| <i>CYB5R3</i>          | -0.565 | 0.016 | Novel gene |
| <i>WDR36</i>           | -0.566 | 0.016 | Novel gene |
| <i>TIPIN</i>           | -0.567 | 0.016 | Novel gene |
| <i>ENSG00000272221</i> | -0.567 | 0.016 | Novel gene |
| <i>RAB37</i>           | -0.568 | 0.016 | Novel gene |
| <i>ENSG00000253326</i> | -0.568 | 0.017 | Novel gene |
| <i>DYDC2</i>           | -0.568 | 0.017 | Novel gene |
| <i>TCTN2</i>           | -0.570 | 0.017 | Novel gene |
| <i>FGL1</i>            | -0.572 | 0.017 | Novel gene |
| <i>LDHA</i>            | -0.572 | 0.018 | Novel gene |
| <i>ENSG00000236155</i> | -0.573 | 0.018 | Novel gene |
| <i>BDKRB1</i>          | -0.573 | 0.018 | Novel gene |
| <i>RELL2</i>           | -0.574 | 0.019 | Novel gene |
| <i>CRYZ</i>            | -0.577 | 0.019 | Novel gene |
| <i>YARS</i>            | -0.578 | 0.019 | Novel gene |
| <i>TRAF3IP2-AS1</i>    | -0.582 | 0.019 | Novel gene |
| <i>PINLYP</i>          | -0.584 | 0.020 | Novel gene |
| <i>IL20RA</i>          | -0.584 | 0.020 | Novel gene |
| <i>UBE2G2</i>          | -0.584 | 0.020 | Novel gene |
| <i>TEX264</i>          | -0.585 | 0.020 | Novel gene |
| <i>ZC3HC1</i>          | -0.585 | 0.021 | Novel gene |
| <i>GCOM2</i>           | -0.587 | 0.021 | Novel gene |
| <i>ENSG00000271643</i> | -0.588 | 0.021 | Novel gene |
| <i>ENSG00000222020</i> | -0.589 | 0.021 | Novel gene |
| <i>LINC00115</i>       | -0.590 | 0.022 | Novel gene |
| <i>NMUR2</i>           | -0.592 | 0.022 | Novel gene |
| <i>DNAH1</i>           | -0.593 | 0.022 | Novel gene |
| <i>ENSG00000214135</i> | -0.593 | 0.023 | Novel gene |
| <i>ENSG00000262528</i> | -0.594 | 0.023 | Novel gene |
| <i>FGFR3</i>           | -0.594 | 0.023 | Novel gene |
| <i>LINC00562</i>       | -0.595 | 0.023 | Novel gene |
| <i>KIAA0391</i>        | -0.595 | 0.024 | Novel gene |
| <i>XRCC3</i>           | -0.596 | 0.024 | Novel gene |
| <i>ENSG00000232063</i> | -0.596 | 0.024 | Novel gene |
| <i>SCN4B</i>           | -0.597 | 0.025 | Novel gene |
| <i>ENSG00000248673</i> | -0.597 | 0.025 | Novel gene |
| <i>SIGLEC10</i>        | -0.598 | 0.025 | Novel gene |
| <i>CDCA5</i>           | -0.598 | 0.025 | Novel gene |
| <i>NKTR</i>            | -0.598 | 0.026 | Novel gene |
| <i>ENSG00000272505</i> | -0.598 | 0.026 | Novel gene |
| <i>ENSG00000256594</i> | -0.599 | 0.026 | Novel gene |
| <i>ACY3</i>            | -0.599 | 0.027 | Novel gene |
| <i>RUVBL2</i>          | -0.599 | 0.027 | Novel gene |
| <i>ENSG00000240685</i> | -0.601 | 0.027 | Novel gene |
| <i>CAMK1G</i>          | -0.602 | 0.027 | Novel gene |

|                        |        |       |               |
|------------------------|--------|-------|---------------|
| <i>REV3L</i>           | -0.602 | 0.028 | Novel gene    |
| <i>ENSG00000258959</i> | -0.602 | 0.028 | Novel gene    |
| <i>ENSG00000231105</i> | -0.603 | 0.028 | Novel gene    |
| <i>DUS2</i>            | -0.603 | 0.028 | Novel gene    |
| <i>DALRD3</i>          | -0.605 | 0.029 | Novel gene    |
| <i>LOH12CR1</i>        | -0.606 | 0.029 | Novel gene    |
| <i>ENSG00000271868</i> | -0.606 | 0.029 | Novel gene    |
| <i>JRK</i>             | -0.606 | 0.030 | Novel gene    |
| <i>TMEM219</i>         | -0.606 | 0.030 | Novel gene    |
| <i>RECQL</i>           | -0.606 | 0.030 | Novel gene    |
| <i>KIF7</i>            | -0.607 | 0.030 | Novel gene    |
| <i>TOX4</i>            | -0.608 | 0.031 | Novel gene    |
| <i>ZNF782</i>          | -0.608 | 0.031 | Novel gene    |
| <i>WASF3</i>           | -0.609 | 0.031 | Novel gene    |
| <i>TPBGL</i>           | -0.610 | 0.031 | Novel gene    |
| <i>CDC42SE2</i>        | -0.610 | 0.032 | Novel gene    |
| <i>ENSG00000257086</i> | -0.610 | 0.032 | Novel gene    |
| <i>7-Sep</i>           | -0.611 | 0.032 | Novel gene    |
| <i>SKA2</i>            | -0.612 | 0.033 | Novel gene    |
| <i>AK5</i>             | -0.612 | 0.033 | Reported gene |
| <i>GPR155</i>          | -0.612 | 0.033 | Novel gene    |
| <i>ENDOG</i>           | -0.613 | 0.033 | Novel gene    |
| <i>ALPK3</i>           | -0.613 | 0.034 | Novel gene    |
| <i>FAM178B</i>         | -0.614 | 0.034 | Novel gene    |
| <i>ARL9</i>            | -0.614 | 0.034 | Novel gene    |
| <i>PFAS</i>            | -0.614 | 0.034 | Novel gene    |
| <i>RSPO2</i>           | -0.614 | 0.035 | Novel gene    |
| <i>ZNF764</i>          | -0.615 | 0.035 | Novel gene    |
| <i>ENSG00000205037</i> | -0.615 | 0.035 | Novel gene    |
| <i>ANKRD20A19P</i>     | -0.615 | 0.035 | Novel gene    |
| <i>DIEXF</i>           | -0.615 | 0.036 | Novel gene    |
| <i>ENSG00000218227</i> | -0.617 | 0.036 | Novel gene    |
| <i>ENSG00000270607</i> | -0.617 | 0.036 | Novel gene    |
| <i>RHOF</i>            | -0.617 | 0.037 | Novel gene    |
| <i>NUS1</i>            | -0.617 | 0.037 | Novel gene    |
| <i>EIF6</i>            | -0.617 | 0.037 | Novel gene    |
| <i>CSRP2</i>           | -0.617 | 0.038 | Novel gene    |
| <i>ENSG00000259658</i> | -0.618 | 0.038 | Novel gene    |
| <i>ITGAV</i>           | -0.618 | 0.038 | Novel gene    |
| <i>WIPF3</i>           | -0.618 | 0.038 | Novel gene    |
| <i>GALNT2</i>          | -0.618 | 0.039 | Novel gene    |
| <i>ENSG00000183562</i> | -0.619 | 0.039 | Novel gene    |
| <i>PARD3B</i>          | -0.619 | 0.039 | Novel gene    |
| <i>ZFYVE20</i>         | -0.619 | 0.039 | Novel gene    |
| <i>LINC00662</i>       | -0.619 | 0.040 | Novel gene    |
| <i>GKNI</i>            | -0.620 | 0.040 | Novel gene    |
| <i>P4HA2</i>           | -0.620 | 0.040 | Novel gene    |
| <i>ENSG00000257433</i> | -0.621 | 0.041 | Novel gene    |
| <i>ENSG00000269473</i> | -0.621 | 0.041 | Novel gene    |
| <i>KHNYN</i>           | -0.621 | 0.041 | Novel gene    |
| <i>SRGAP2C</i>         | -0.622 | 0.041 | Novel gene    |
| <i>CCDC144B</i>        | -0.622 | 0.041 | Novel gene    |
| <i>ENSG00000224376</i> | -0.623 | 0.042 | Novel gene    |

|                        |        |       |            |
|------------------------|--------|-------|------------|
| <i>ENSG00000235448</i> | -0.624 | 0.042 | Novel gene |
| <i>HCG17</i>           | -0.624 | 0.042 | Novel gene |
| <i>ENSG00000229407</i> | -0.625 | 0.043 | Novel gene |
| <i>ZNF253</i>          | -0.625 | 0.043 | Novel gene |
| <i>CCDC183-AS1</i>     | -0.627 | 0.043 | Novel gene |
| <i>ENSG00000261037</i> | -0.628 | 0.044 | Novel gene |
| <i>GDF6</i>            | -0.628 | 0.044 | Novel gene |
| <i>CHRAC1</i>          | -0.630 | 0.044 | Novel gene |
| <i>LEPR</i>            | -0.630 | 0.044 | Novel gene |
| <i>VNIR108P</i>        | -0.630 | 0.045 | Novel gene |
| <i>ENSG00000259251</i> | -0.630 | 0.045 | Novel gene |
| <i>FOLH1</i>           | -0.630 | 0.045 | Novel gene |
| <i>VAMP1</i>           | -0.631 | 0.045 | Novel gene |
| <i>SMYD3</i>           | -0.631 | 0.046 | Novel gene |
| <i>FER1L4</i>          | -0.631 | 0.046 | Novel gene |
| <i>DNALI</i>           | -0.633 | 0.046 | Novel gene |
| <i>ROM1</i>            | -0.633 | 0.047 | Novel gene |
| <i>CDKN2B</i>          | -0.633 | 0.047 | Novel gene |
| <i>LGALS3</i>          | -0.633 | 0.047 | Novel gene |
| <i>A4GNT</i>           | -0.634 | 0.047 | Novel gene |
| <i>ENSG00000265519</i> | -0.634 | 0.048 | Novel gene |
| <i>ENSG00000258985</i> | -0.635 | 0.048 | Novel gene |
| <i>SWAP70</i>          | -0.635 | 0.048 | Novel gene |
| <i>FAM69A</i>          | -0.635 | 0.048 | Novel gene |
| <i>ZNF136</i>          | -0.635 | 0.049 | Novel gene |
| <i>PSD3</i>            | -0.636 | 0.049 | Novel gene |
| <i>NELFCD</i>          | -0.636 | 0.049 | Novel gene |
| <i>PREX2</i>           | -0.637 | 0.049 | Novel gene |
| <i>EPB41L5</i>         | -0.637 | 0.050 | Novel gene |

**Supplemental Table S8. Five Insomnia-associated risk genes identified by Sherlock integrative analysis between two eQTL datasets**

| <i>Gene name</i> | <b>Discovery stage</b>            |                                      |                                       |                                           | <b>Validation stage</b>           |                                      |                                       |                                           | <i>Differential expression in Brain between insomnia and control</i> |
|------------------|-----------------------------------|--------------------------------------|---------------------------------------|-------------------------------------------|-----------------------------------|--------------------------------------|---------------------------------------|-------------------------------------------|----------------------------------------------------------------------|
|                  | <i>Supporting SNP<sup>a</sup></i> | <i>eSNP-based Pvalue<sup>b</sup></i> | <i>GWAS-based P value<sup>c</sup></i> | <i>Sherlock-based P value<sup>d</sup></i> | <i>Supporting SNP<sup>a</sup></i> | <i>eSNP-based Pvalue<sup>b</sup></i> | <i>GWAS-based P value<sup>c</sup></i> | <i>Sherlock-based P value<sup>d</sup></i> |                                                                      |
| <i>LDHA</i>      | rs8131143                         | 9.73E-06                             | 8.97E-01                              | 9.11E-03                                  | rs10741758                        | 7.98E-06                             | 7.73E-01                              | 1.77E-02                                  | 4.40E-02                                                             |
| <i>DALRD3</i>    | rs2782892                         | 8.43E-06                             | 3.71E-01                              | 1.13E-02                                  | rs6795772                         | 9.70E-06                             | 2.34E-02                              | 2.85E-02                                  | 5.00E-05                                                             |
| <i>TEX264</i>    | rs6762880                         | 8.57E-06                             | 4.35E-01                              | 3.29E-02                                  | rs6778196                         | 8.77E-06                             | 6.09E-01                              | 2.04E-02                                  | 3.89E-01                                                             |
| <i>FGFR3</i>     | rs1407228                         | 9.06E-06                             | 1.14E-01                              | 2.35E-02                                  | rs2234909                         | 8.08E-06                             | 6.58E-01                              | 2.31E-02                                  | 7.75E-01                                                             |
| <i>HEBP2</i>     | rs766310                          | 6.26E-06                             | 6.25E-01                              | 4.62E-02                                  | rs4896353                         | 7.36E-06                             | 8.75E-01                              | 1.51E-02                                  | 3.20E-02                                                             |

Note: <sup>a</sup> SNP influences the expression level of risk gene.

<sup>b</sup>P-value from expression quantitative trait analysis of Myers et al.

<sup>c</sup>P-value from GWAS on insomnia of Jansen et al.

<sup>d</sup>P-value from calculation based on the *Sherlock* Bayesian integrative analysis. In light of *Sherlock* tool uses finite times of permutation test to calculate the Pvalue for each gene, some of these top-ranked genes have distinct logarithm of the Bayes factor values but obtain the same rankings (namely, their P values are same).

**Supplemental Table S9. The co-expression analysis of the 5 identified genes based on the Pearson correlation method in all samples of GSE40562**

|               | <i>LDHA</i> | <i>DALRD3</i> | <i>TEX264</i> | <i>FGFR3</i> | <i>HEBP2</i> |
|---------------|-------------|---------------|---------------|--------------|--------------|
| <i>LDHA</i>   | 1.00        | 0.62          | -0.40         | -0.34        | 0.32         |
| <i>DALRD3</i> | 0.62        | 1.00          | -0.48         | -0.09        | 0.54         |
| <i>TEX264</i> | -0.40       | -0.48         | 1.00          | 0.55         | -0.31        |
| <i>FGFR3</i>  | -0.34       | -0.09         | 0.55          | 1.00         | 0.19         |
| <i>HEBP2</i>  | 0.32        | 0.54          | -0.31         | 0.19         | 1.00         |

**Supplemental Table S10. The co-expression analysis of the 5 identified genes based on the Pearson correlation method in insomnia patients of GSE40562**

|               | <i>LDHA</i> | <i>DALRD3</i> | <i>TEX264</i> | <i>FGFR3</i> | <i>HEBP2</i> |
|---------------|-------------|---------------|---------------|--------------|--------------|
| <i>LDHA</i>   | 1.00        | 0.06          | -0.18         | -0.34        | -0.17        |
| <i>DALRD3</i> | 0.06        | 1.00          | -0.31         | 0.21         | -0.24        |
| <i>TEX264</i> | -0.18       | -0.31         | 1.00          | 0.58         | -0.12        |
| <i>FGFR3</i>  | -0.34       | 0.21          | 0.58          | 1.00         | 0.14         |
| <i>HEBP2</i>  | -0.17       | -0.24         | -0.12         | 0.14         | 1.00         |
